# Supplementary material for: Kinetics and mechanism of the OH-radical and Cl-atom oxidation of propylene carbonate
Source: Royal Society of Chemistry journal article supplement (doi:10.1039/c6ra21952g), 2016-01-01
Supplement: c6ra21952g1.pdf [file c6ra21952g1.pdf]

## Electronic Supplementary Information

### Kinetics and Mechanism of the OH-radical and Cl-atom Oxidation of Propylene

#### Carbonate

Ian Barnes<sup>a,\*</sup>, Peter Wiesen<sup>a</sup>, Michael Gallus<sup>a</sup>

<sup>a</sup> *University of Wuppertal, School of Mathematics and Natural Sciences, Institute for Atmospheric and Environmental Research, Gauss Strasse 20, 42119 Wuppertal, Germany*

\* Author to whom correspondence should be addressed

Tel.: +49 202 439 2510

Fax: +49 202 4392505

Email; [barnes@uni-wuppertal.de](mailto:barnes@uni-wuppertal.de)

#### Content Summary

The SI contains i) absorbance-time behavior of propylene carbonate and the main product assigned to acetyl formyl carbonate, ii) a product spectrum from the irradiation of a propylene carbonate/Cl<sub>2</sub> mixture in nitrogen (Fig. S2), iii) a concentration-time profile of the identified products from irradiation of a propylene carbonate/Cl<sub>2</sub> mixture in nitrogen (Fig. S3), vi) dependence of the acetic acid yield on oxygen (Fig. S4) and iv) postulated mechanism for acetic acid formation (Scheme S1).

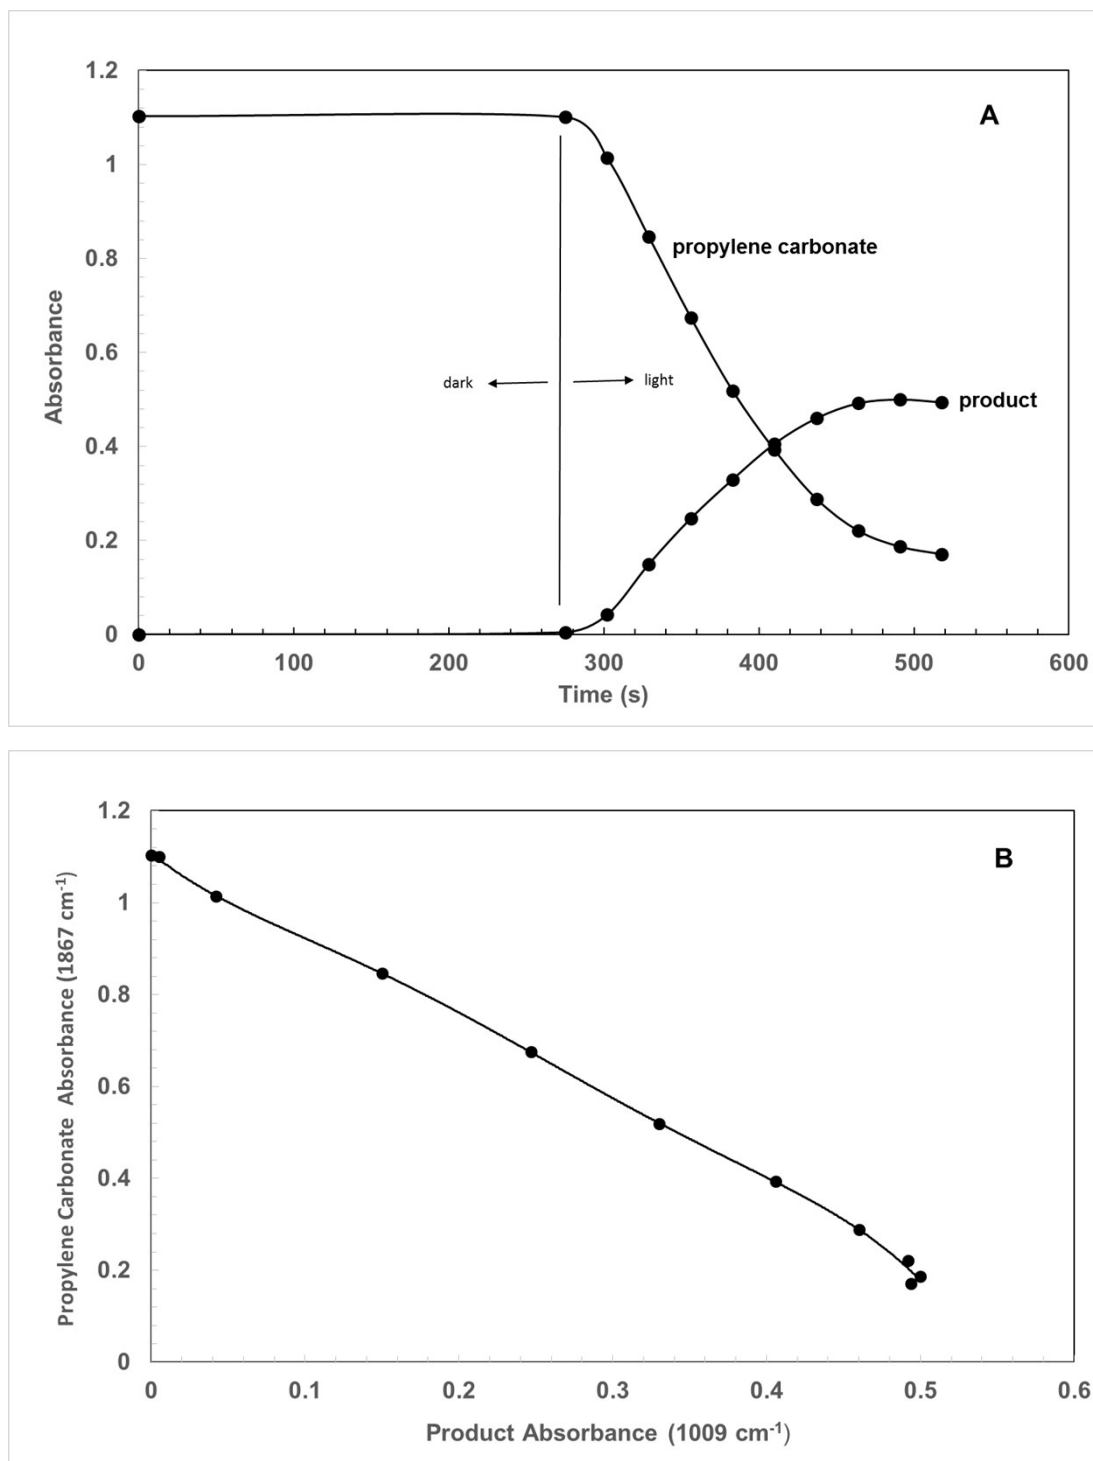

**Fig. S1** Panel A shows the absorbance of the carbonyl absorption of propylene carbonate at  $1867\text{ cm}^{-1}$  and the absorption of the assigned product acetyl formyl carbonate at  $1009\text{ cm}^{-1}$  as a function of time. Panel B shows a plot of the propylene carbonate absorbance at  $1867\text{ cm}^{-1}$  versus the product absorbance at  $1009\text{ cm}^{-1}$ .

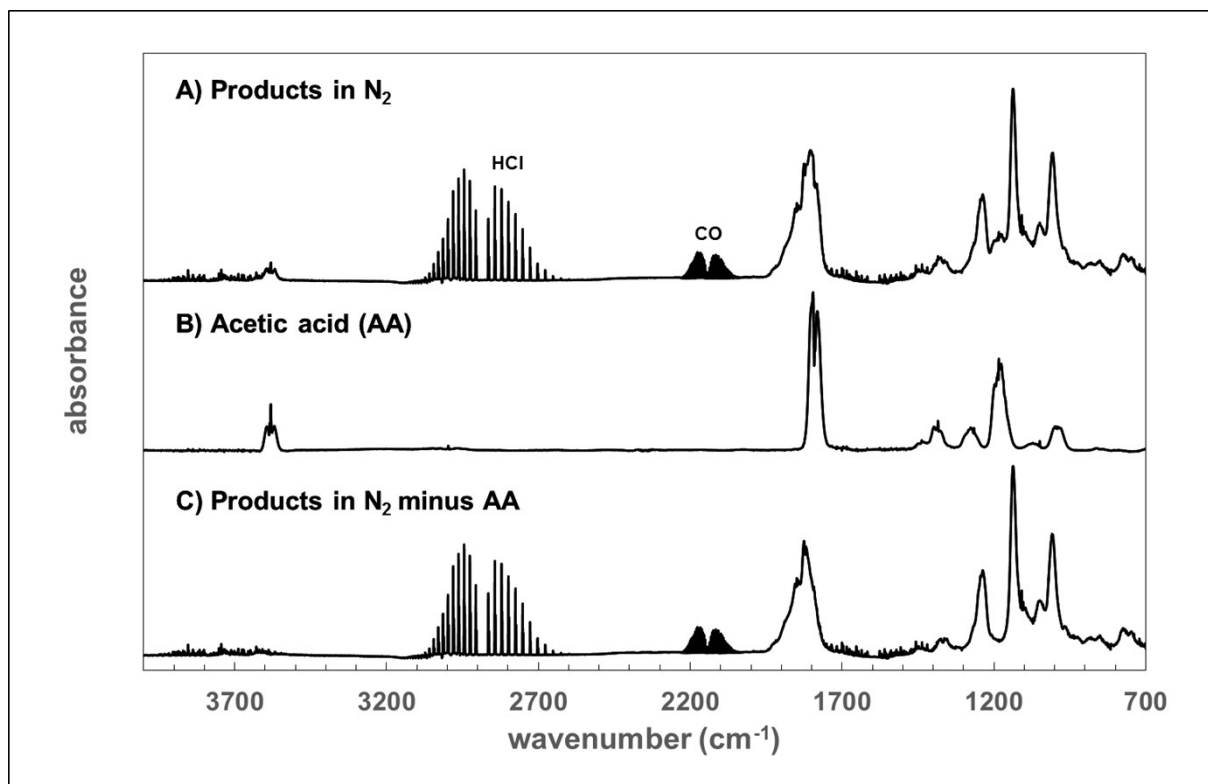

**Fig. S2** Products formed in the irradiation of a propylene carbonate/ $\text{Cl}_2$  mixture in nitrogen. Trace (A) is the product spectrum after irradiation and subtraction of excess propylene carbonate, trace (B) is a reference spectrum of acetic acid and trace (C) is the residual product spectrum after subtraction of acetic acid from the spectrum in trace (A).

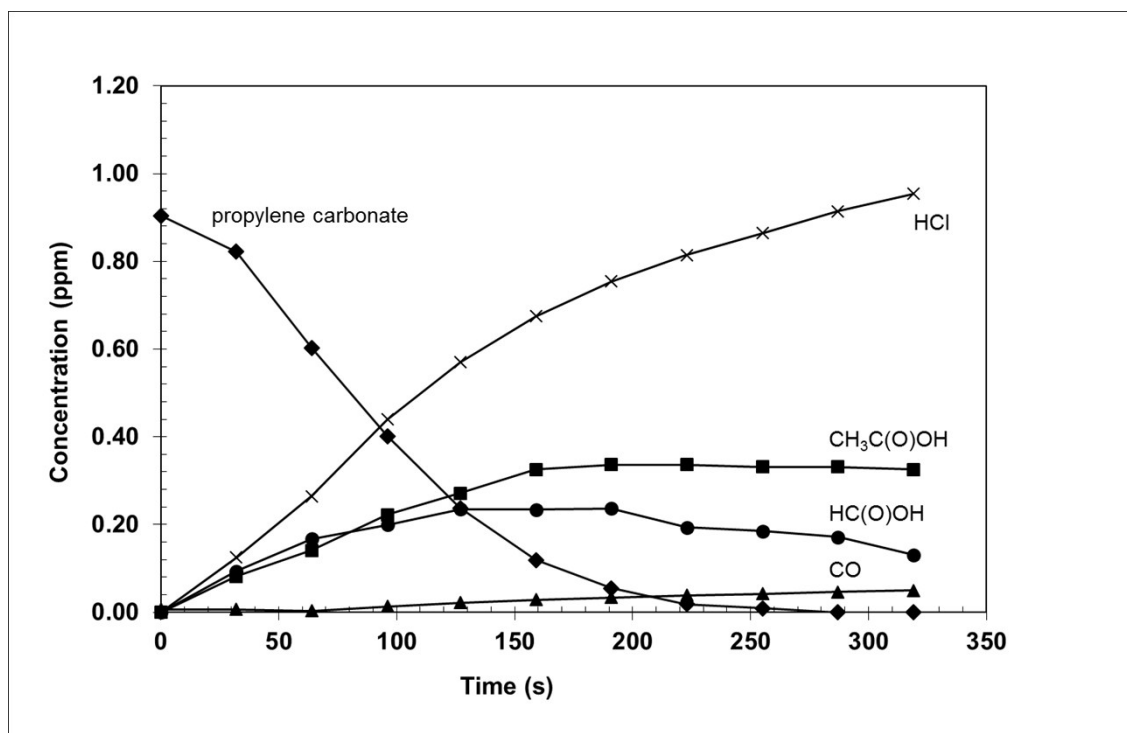

**Fig. S3** Concentration-time profile for the decay of propylene carbonate and the formation of products on irradiation of a propylene carbonate/ $\text{Cl}_2/\text{N}_2$  mixture.

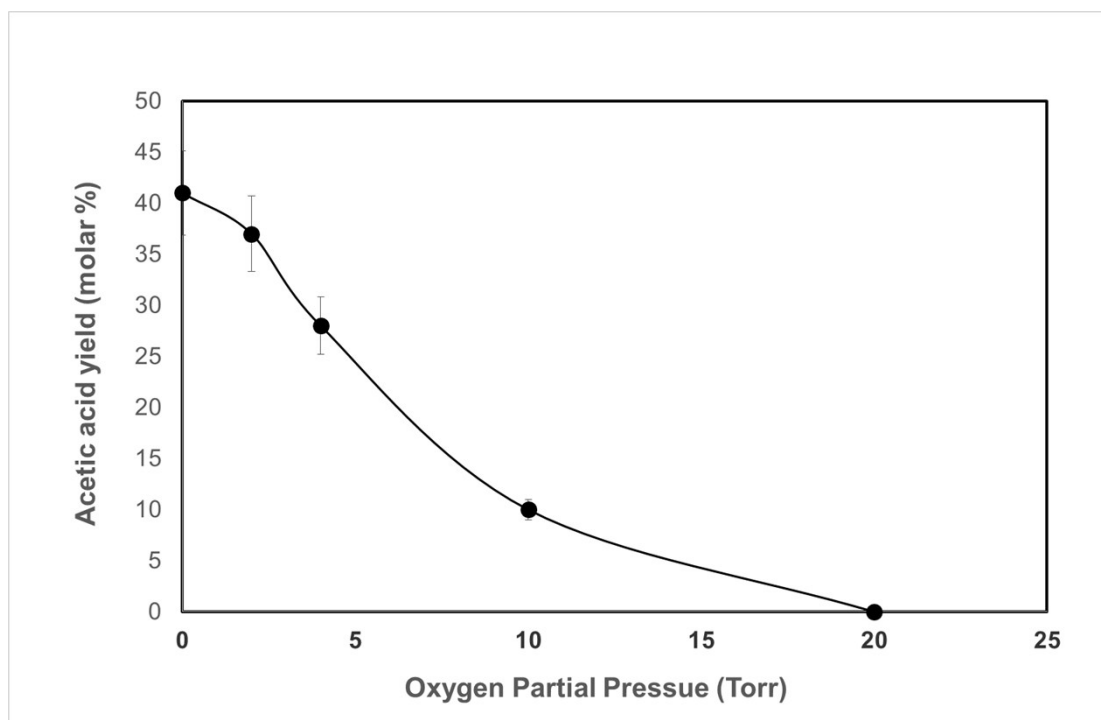

**Fig. S4** Photolysis of a propylene carbonate/ $\text{Cl}_2/\text{N}_2$  mixture: Dependence of the acetic yields on the oxygen partial pressure.

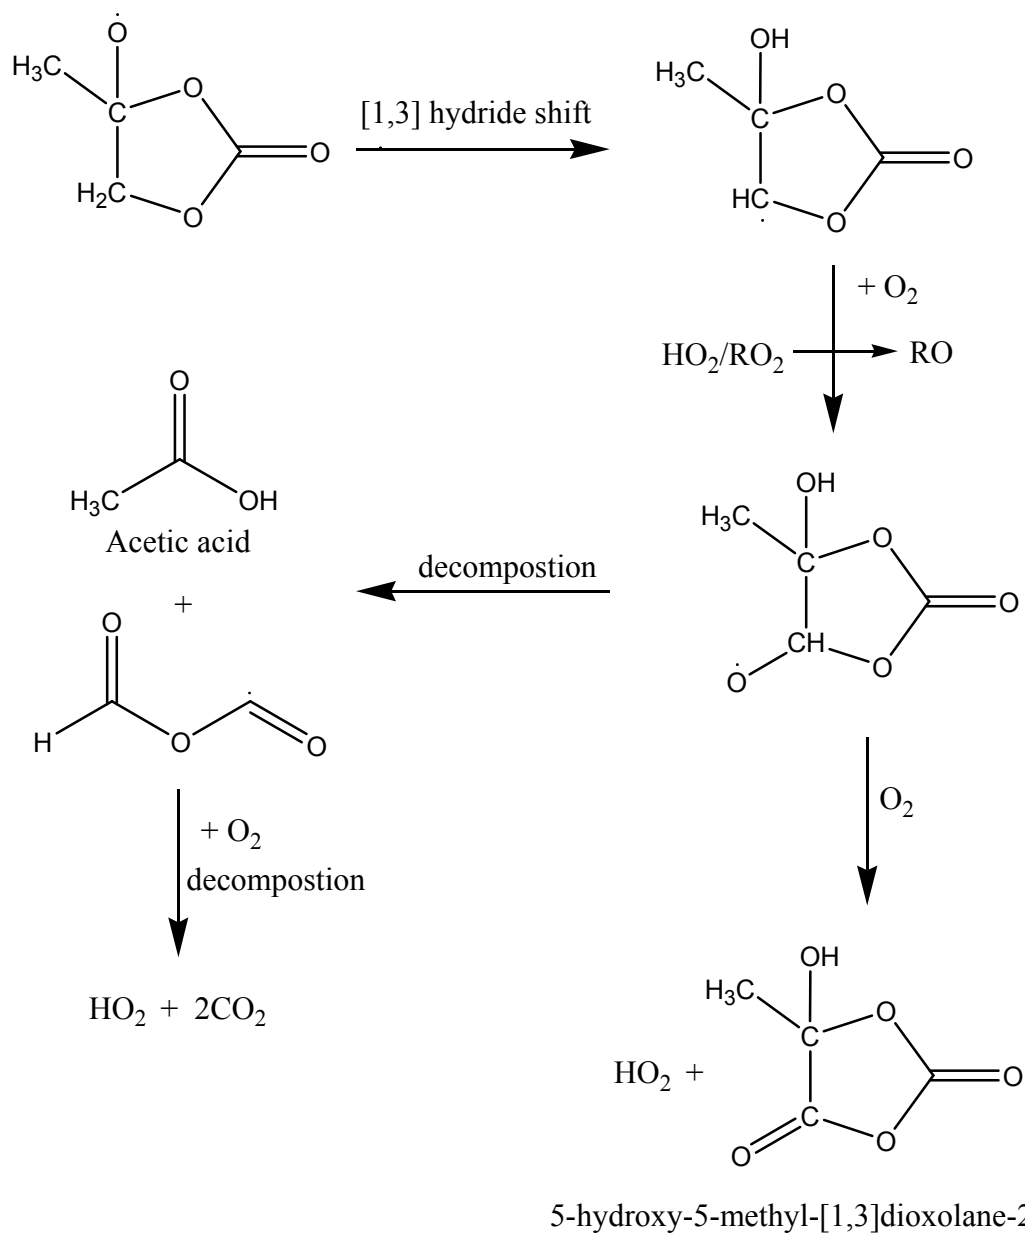

**Scheme S1** Possible mechanism, involving an  $\alpha$ -ester rearrangement, for the formation of acetic acid in the Cl-atom initiated oxidation of propylene carbonate in  $N_2$ .
